# Supplementary material
Source: Springer Nature journal article supplement (https://www.springermedizin.de/resource/supplementary/12884_2013_930_MOESM1_ESM.pdf/9459244)

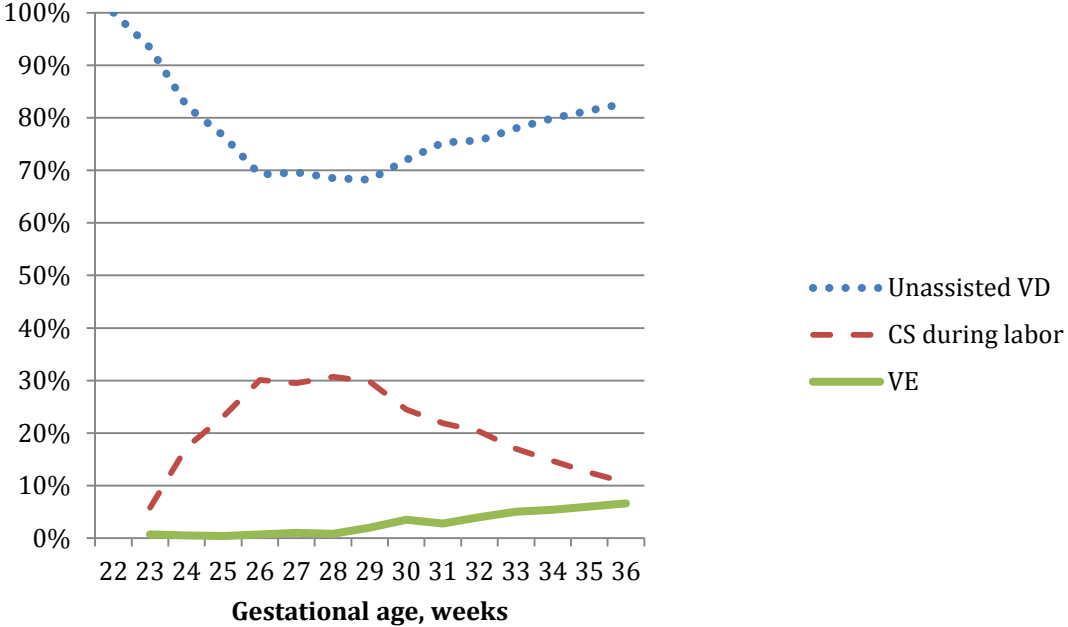

Supplement: MOESM1 [file 9459244]
